# Supplementary material for: INVENTORY OF AFRICAN DESERT DUST EVENTS IN THE NORTH-CENTRAL IBERIAN PENINSULA IN 2003–2014 BASED ON SUNPHOTOMETER-AERONET AND PARTICULATE MASS-EMEP DATA
Source: Copernicus journal article supplement (doi:10.5194/acp-2016-41), 2016-02-19
Supplement: Supplementary file 1 [file acp-2016-41-supplement.pdf]

Figure S1

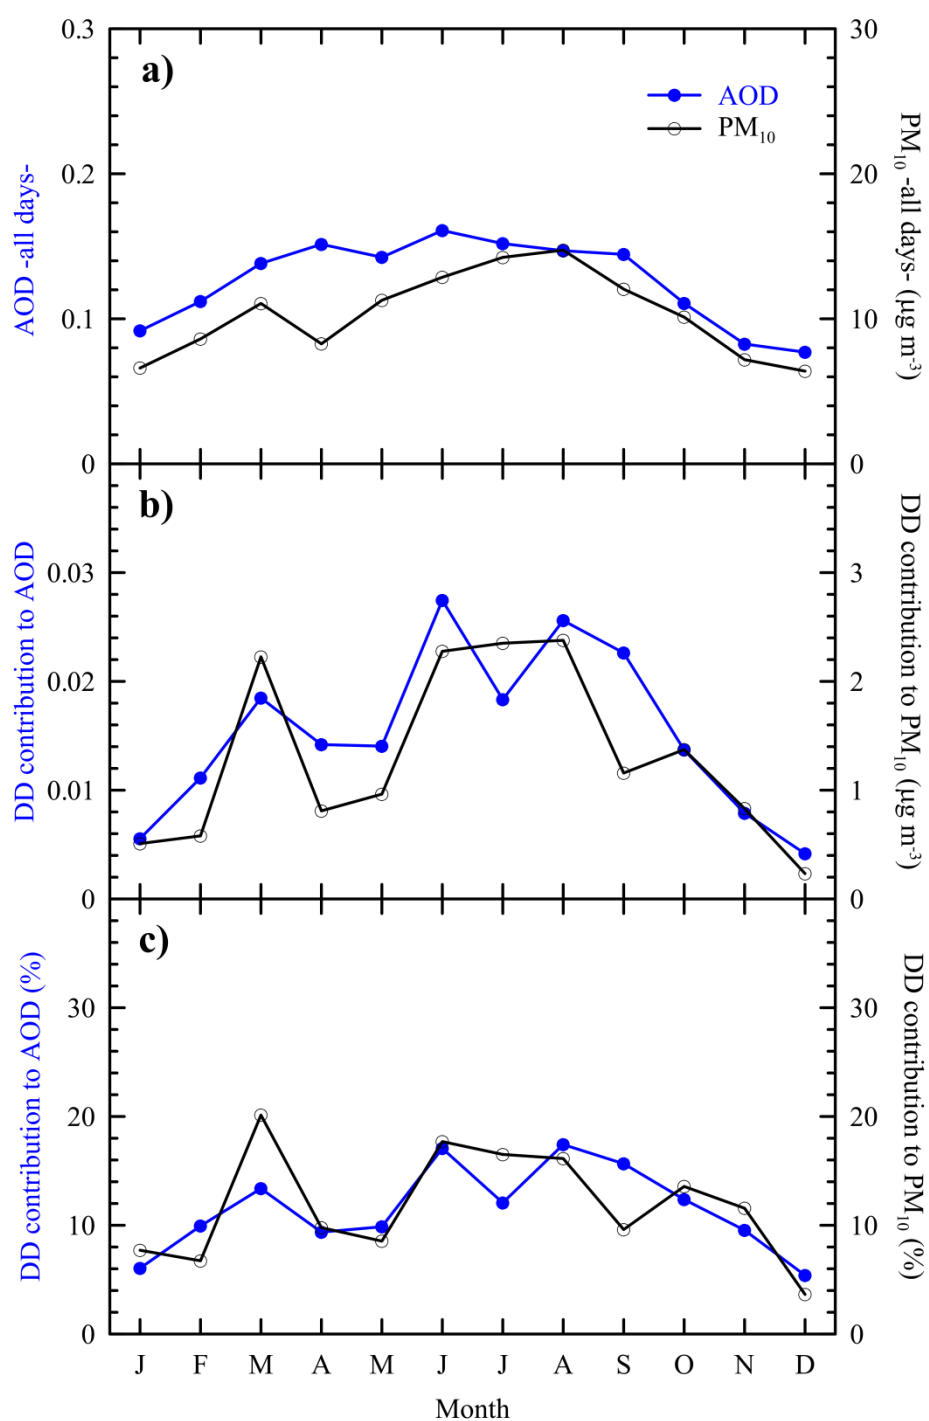

Figure S1. a) Annual cycle of the total AOD and PM<sub>10</sub>; b) annual cycle of the contribution of DD to total AOD and PM<sub>x</sub> in absolute and c) relative values.

Figure S2

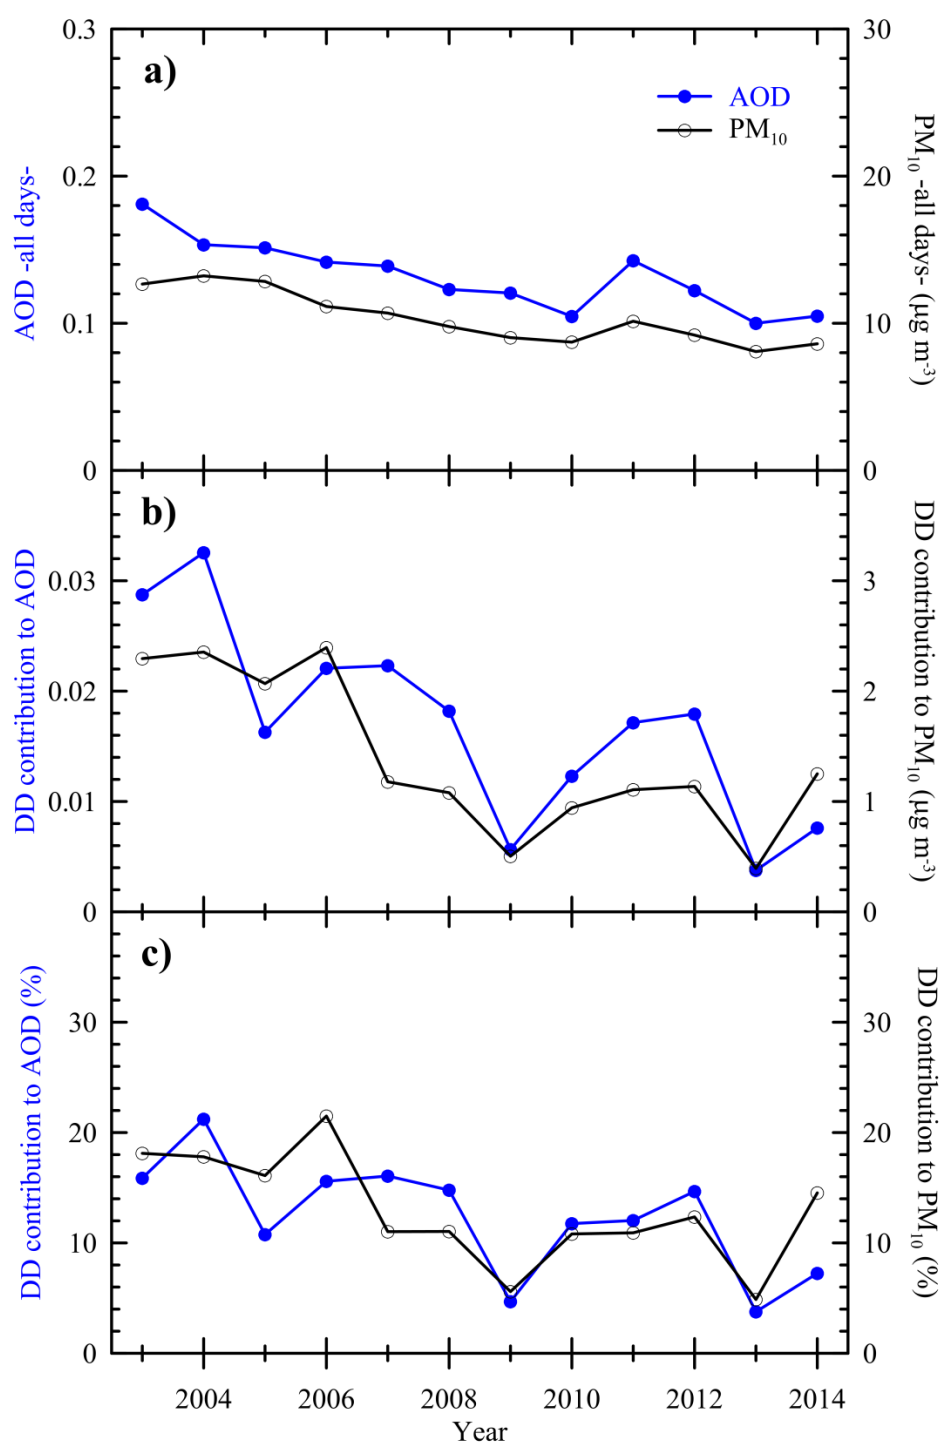

Figure S2. a) Inter-annual variation of the total AOD and PM<sub>10</sub>; b) inter-annual variation of the contribution of DD to total AOD and PM<sub>x</sub> in absolute and c) relative values.
